# Supplementary material
Source: MDPI journal article supplement (https://www.mdpi.com/2571-8789/4/3/44)
Supplement: s1 [file s1]

## Bacteria (16S)

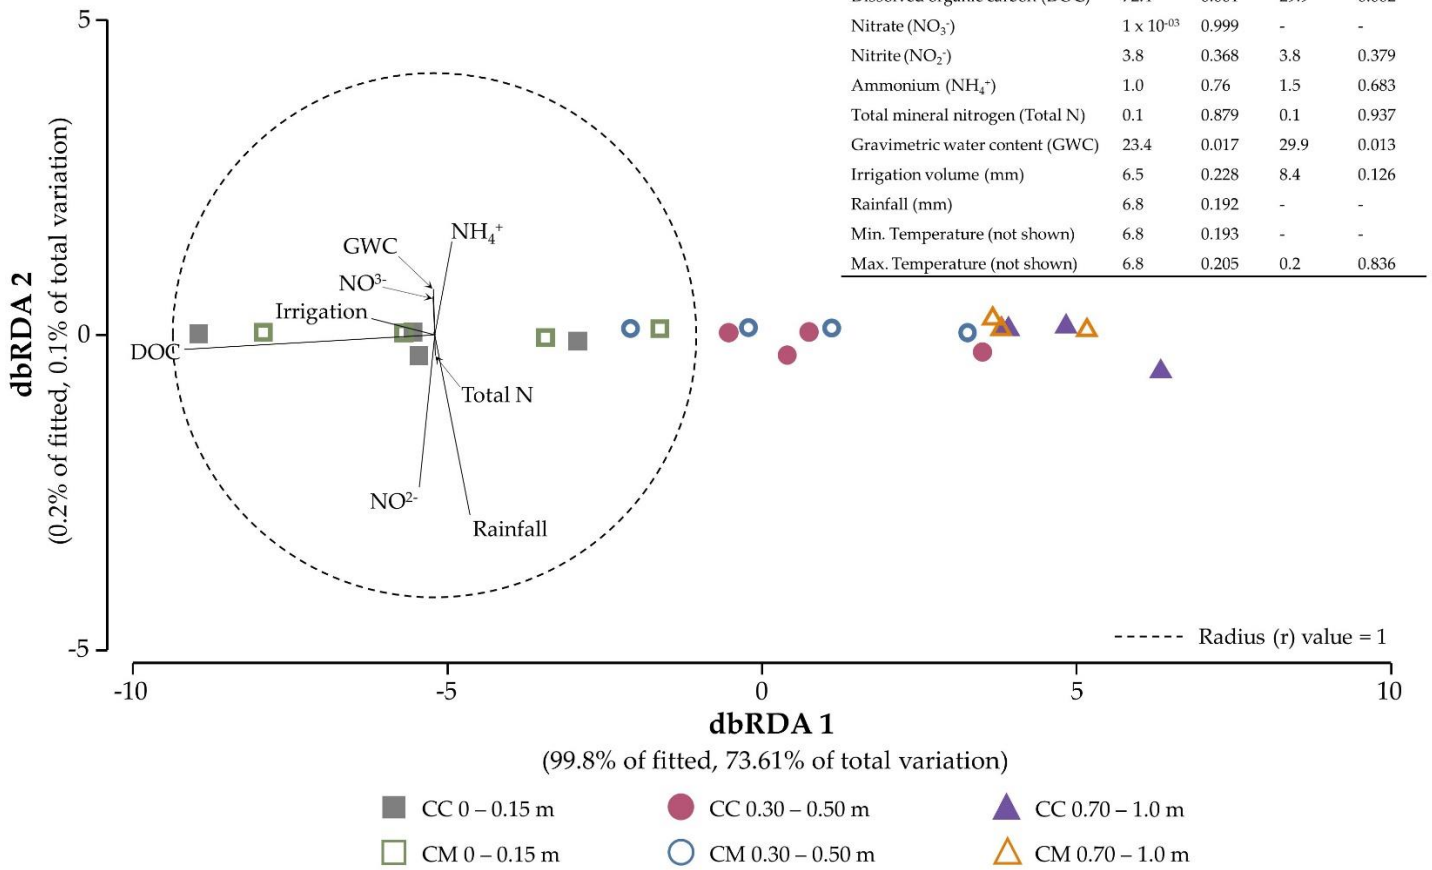

**Figure S1.** Distance-based redundancy analysis (dbRDA) plot of 16S absolute abundance OTU data against environmental factors (Table S1) where, based on a distance-based linear model (DISTLM) sequential tests [1,2].

## References

1. Legendre, P.; Anderson, M.J. Distance-based redundancy analysis: testing multispecies responses in multifactorial ecological experiments. *Ecological monographs* **1999**, *69*, 1-24.
2. Anderson, M.J.; Gorley, R.N.; Clarke, K.R. PERMANOVA+ for PRIMER: Guide to Software and Statistical Methods. First edition ed.; PRIMER-E: Plymouth, UK., 2008.

## Fungi (ITS)

| Environmental Factor                     | Marginal Tests |       | Sequential Tests |       |
|------------------------------------------|----------------|-------|------------------|-------|
|                                          | (%)            | P     | (%)              | P     |
| Dissolved organic carbon (DOC)           | 62.2           | 0.001 | 11.2             | 0.015 |
| Nitrate (NO <sub>3</sub> <sup>-</sup> )  | 4.4            | 0.358 | 4.4              | 0.344 |
| Nitrite (NO <sub>2</sub> <sup>-</sup> )  | 1.8            | 0.516 | 1.6              | 0.584 |
| Ammonium (NH <sub>4</sub> <sup>+</sup> ) | 2.3            | 0.642 | 2.1              | 0.642 |
| Total mineral nitrogen (Total N)         | 2.1            | 0.498 | -                | -     |
| Gravimetric water content (GWC)          | 30.6           | 0.008 | 48.9             | 0.001 |
| Irrigation volume (mm)                   | 2.9            | 0.442 | 7.2              | 0.066 |
| Rainfall (mm)                            | 3.0            | 0.430 | -                | -     |
| Min. Temperature (not shown)             | 3.0            | 0.399 | -                | -     |
| Max. Temperature (not shown)             | 3.0            | 0.428 | 0.6              | 0.593 |

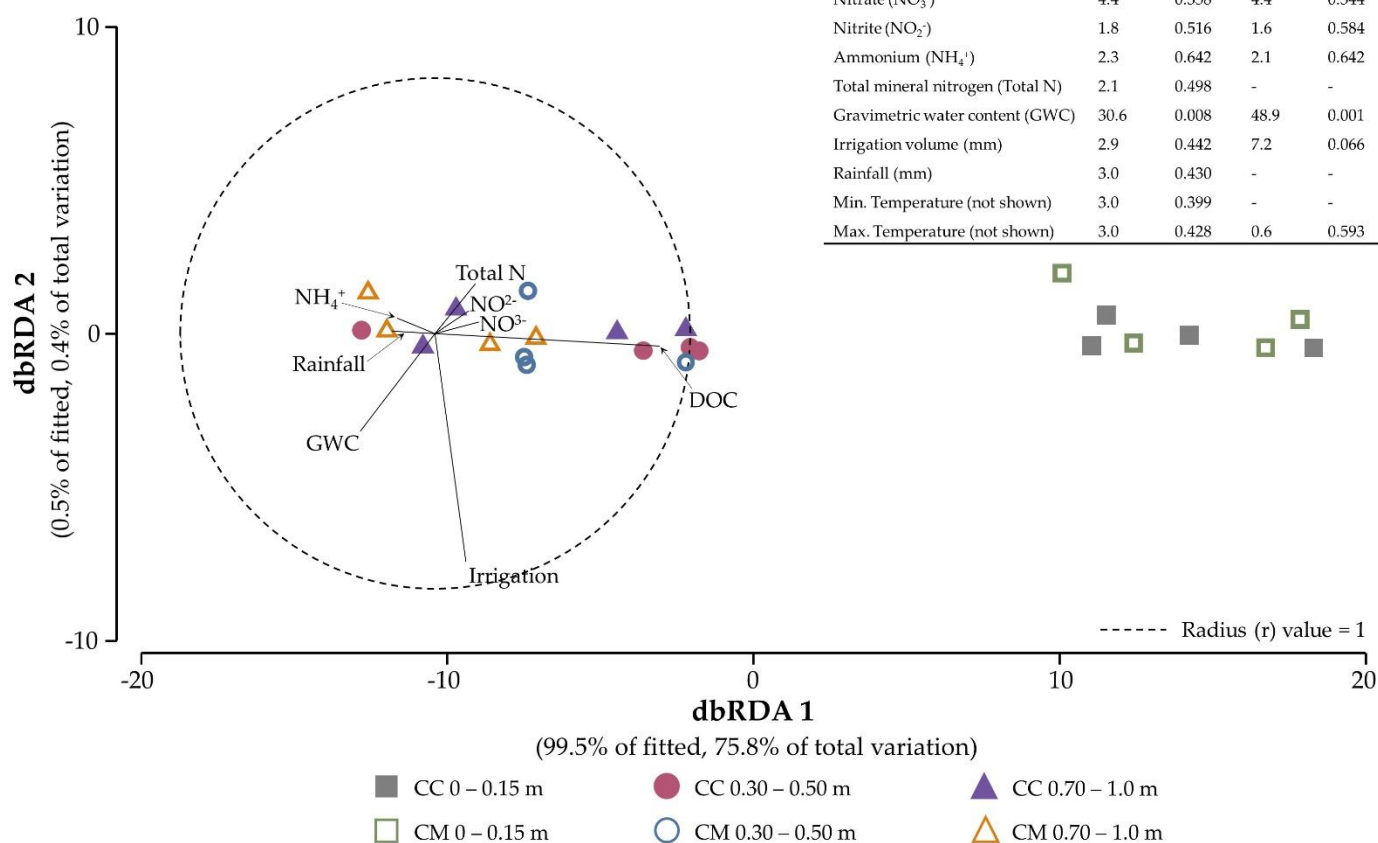

**Figure S2.** Distance-based redundancy analysis (dbRDA) plot of ITS absolute abundance OTU data against environmental factors (Table S1), based on a distance-based linear model (DISTLM) sequential tests [1,2].

## References

- Anderson, M.J.; Gorley, R.N.; Clarke, K.R. PERMANOVA+ for PRIMER: Guide to Software and Statistical Methods. First edition ed.; PRIMER-E: Plymouth, UK., 2008.
- Legendre, P.; Anderson, M.J. Distance-based redundancy analysis: testing multispecies responses in multifactorial ecological experiments. *Ecological monographs* **1999**, *69*, 1-24.

**Table S1.** Compilation of available soil characteristics and environmental parameters over the two growing seasons. Underlined superscript numbers correspond to footnote numbers.

| Time                  | System | Depth (m) | DOC (mg/kg) <sup>1</sup> | Mineral N (μg/g) <sup>2</sup> |                              |                              |       | P (μg P g <sup>-1</sup> soil) <sup>3</sup> | Exchangeable cations (cmol(+) kg <sup>-1</sup> ) <sup>4</sup> |      |      |     | pH <sup>4</sup> |
|-----------------------|--------|-----------|--------------------------|-------------------------------|------------------------------|------------------------------|-------|--------------------------------------------|---------------------------------------------------------------|------|------|-----|-----------------|
|                       |        |           |                          | NO <sub>3</sub> <sup>-</sup>  | NO <sub>2</sub> <sup>-</sup> | NH <sub>4</sub> <sup>+</sup> | Total |                                            | K                                                             | Ca   | Mg   | Na  |                 |
| S1 Pre<br>Oct<br>2015 | CC     | 0–0.15    | -                        | 34.5                          | 39.1                         | 0.1                          | 73.7  | -                                          | 1.4                                                           | 18.3 | 8.5  | 0.5 | 7.2             |
|                       |        | 0.30–0.50 | -                        | 23.2                          | 11.7                         | 0.0                          | 34.9  | -                                          | 0.9                                                           | 18.3 | 9.2  | 1.0 | 7.2             |
|                       |        | 0.70–1.0  | -                        | 11.5                          | 41.0                         | 0.0                          | 52.6  | -                                          | 1.0                                                           | 15.5 | 10.1 | 1.8 | 7.4             |
|                       | CM     | 0–0.15    | -                        | 20.9                          | 51.4                         | 0.0                          | 72.3  | -                                          | 1.6                                                           | 17.5 | 8.1  | 0.4 | 7.2             |
|                       |        | 0.30–0.50 | -                        | 14.5                          | 20.2                         | 0.0                          | 34.6  | -                                          | 1.3                                                           | 17.5 | 8.8  | 0.8 | 7.2             |
|                       |        | 0.70–1.0  | -                        | 6.4                           | 4.5                          | 0.0                          | 10.9  | -                                          | 1.1                                                           | 16.0 | 9.9  | 1.6 | 7.3             |
| S1 In<br>Jan<br>2016  | CC     | 0–0.15    | 72.4                     | 47.0                          | 0.0                          | 0.0                          | 47.0  | 669                                        | -                                                             | -    | -    | -   | -               |
|                       |        | 0.30–0.50 | 42.3                     | 51.3                          | 0.1                          | 0.0                          | 51.3  | 588                                        | -                                                             | -    | -    | -   | -               |
|                       |        | 0.70–1.0  | 22.5                     | 25.5                          | 0.1                          | 3.6                          | 29.2  | 629                                        | -                                                             | -    | -    | -   | -               |
|                       | CM     | 0–0.15    | 64.0                     | 43.1                          | 0.0                          | 0.0                          | 43.1  | 680                                        | -                                                             | -    | -    | -   | -               |
|                       |        | 0.30–0.50 | 37.4                     | 59.2                          | 1.2                          | 1.2                          | 61.6  | 567                                        | -                                                             | -    | -    | -   | -               |

|                       |    |           |      |      |     |      |      |     |   |   |   |   |   |
|-----------------------|----|-----------|------|------|-----|------|------|-----|---|---|---|---|---|
| S2 Pre<br>Oct<br>2016 | CC | 0.70–1.0  | 27.8 | 8.4  | 0.0 | 0.0  | 8.5  | 824 | - | - | - | - | - |
|                       |    | 0–0.15    | -    | 5.6  | 0.1 | 1.4  | 7.1  | -   | - | - | - | - | - |
|                       |    | 0.30–0.50 | -    | 22.3 | 0.0 | 0.2  | 22.5 | -   | - | - | - | - | - |
|                       | CM | 0.70–1.0  | -    | 30.2 | 0.0 | 0.6  | 30.8 | -   | - | - | - | - | - |
|                       |    | 0–0.15    | -    | 3.1  | 0.2 | 0.5  | 3.8  | -   | - | - | - | - | - |
|                       |    | 0.30–0.50 | -    | 18.8 | 0.1 | 0.3  | 19.3 | -   | - | - | - | - | - |
| S2 In<br>Jan<br>2017  | CC | 0.70–1.0  | -    | 19.3 | 0.1 | 0.4  | 19.8 | -   | - | - | - | - | - |
|                       |    | 0–0.15    | 84.7 | 9.4  | 0.0 | 3.1  | 12.5 | -   | - | - | - | - | - |
|                       |    | 0.30–0.50 | 48.5 | 16.3 | 0.1 | 1.5  | 17.9 | -   | - | - | - | - | - |
|                       | CM | 0.70–1.0  | 29.6 | 34.3 | 0.0 | 1.7  | 36.0 | -   | - | - | - | - | - |
|                       |    | 0–0.15    | 80.4 | 29.0 | 0.0 | 1.9  | 30.9 | -   | - | - | - | - | - |
|                       |    | 0.30–0.50 | 53.8 | 9.3  | 0.0 | 1.2  | 10.6 | -   | - | - | - | - | - |
|                       |    | 0.70–1.0  | 32.4 | 15.1 | 0.1 | 13.0 | 28.2 | -   | - | - | - | - |   |

<sup>1</sup> Water extractable DOC, subset of data published in Osanai, *et al.* [1]

<sup>2</sup> Mineral N extracted in 2M KCl and analysed using a San<sup>++</sup> Automated Wet Chemistry Analyser (Continuous Flow Analyzer) (Skalar Analytical B.V., Netherlands).

<sup>3</sup> Total extractable P, subset of data published in Polain, *et al.* [2]

<sup>4</sup> Exchangeable cations extracted in alcoholic 1 M NH<sub>4</sub>Cl solution at pH 8.5 and soil pH determined using 0.01 M CaCl<sub>2</sub>, with methods and data published in Hulugalle, *et al.* [3]

<sup>5</sup> Gravimetric Water Content (GWC) determined by drying a known mass of sample at 100°C for 3 days until a stable weight was obtained, where soil water content (g/g) was the difference in soil weight (g) between field fresh and oven dried soils, divided by the weight of oven dried soils (g).

<sup>6</sup> Irrigation volumes were retrieved from Nachimuthu, *et al.* [4]

<sup>7</sup> Rainfall and soil temperatures were accessed via the CottASSIST web tool developed by CSIRO [5]. Rainfall is the cumulative total for the three months prior to sampling.

## References

- Osanai, Y.; Knox, O.; Nachimuthu, G.; Wilson, B. Increasing soil organic carbon with maize in cotton-based cropping systems: Mechanisms and potential. *Agriculture, Ecosystems & Environment* **2020**, *299*, 106985.
- Polain, K.; Guppy, C.; Knox, O.; Lisle, L.; Wilson, B.; Osanai, Y.; Siebers, N. Determination of Agricultural Impact on Soil Microbial Activity Using  $\delta^{18}O$  P HCl and Respiration Experiments. *ACS Earth and Space Chemistry* **2018**, *2*, 683–691, doi:10.1021/acsearthspacechem.8b00021.
- Hulugalle, N.; Nachimuthu, G.; Kirkby, K.; Lonergan, P.; Heimoana, V.; Watkins, M.; Finlay, L. Sowing maize as a rotation crop in irrigated cotton cropping systems in a Vertisol: effects on soil properties, greenhouse gas emissions, black root rot incidence, cotton lint yield and fibre quality. *Soil Research* **2020**, *58*, 137–150.
- Nachimuthu, G.; Hulugalle, N.R.; Watkins, M.D.; Finlay, L.A.; McCorkell, B. Irrigation induced surface carbon flow in a Vertisol under furrow irrigated cotton cropping systems. *Soil and Tillage Research* **2018**, *183*, 8–18.
- CSIRO. CottASSIST. Available online: <https://www.cottassist.com.au/> (accessed on 2018).
